## Administration approaches of nursing assistants in hospitals: a scoping review

**Authors:** Ben-tuo Zeng<sup>†</sup>, Ying-hui Jin<sup>†</sup>, Shu-dong Cheng<sup>†</sup>, Yan-ming Ding, Ji-wei Du

**Correspondence:** Ji-wei Du, The University of Hong Kong – Shenzhen Hospital, 1 Haiyuan 1<sup>st</sup> Road, Shenzhen 518040, Guangdong Province, China. E-mail: [dujw@hku-szh.org](mailto:dujw@hku-szh.org); Telephone Number: +86-15359350116.

### Author Affiliations:

- 1 Ben-tuo Zeng, BSc; Department of Nursing, School of Medicine, Xiamen University, Xiamen 361104, Fujian Province, China. ORCID: 0000-0003-1769-5104. E-mail: [zengbentuoxmu@outlook.com](mailto:zengbentuoxmu@outlook.com)
- 2 Ying-hui Jin, PhD, Associate Professor; Centre for Evidence-Based and Translational Medicine, Zhongnan Hospital of Wuhan University, Wuhan 430071, Hubei Province, China. E-mail: [jinyinghui0301@163.com](mailto:jinyinghui0301@163.com)
- 3 Shu-dong Cheng, MSc, Nurse Practitioner; Xiang'an Hospital of Xiamen University, Xiamen 361102, Fujian Province, China. E-mail: [shdcheng@xmu.edu.cn](mailto:shdcheng@xmu.edu.cn)
- 4 Yan-ming Ding, Professor of Nursing; Nursing Department, Peking University First Hospital, Beijing 100034, Beijing, China. E-mail: [dingym60@126.com](mailto:dingym60@126.com)
- 5 Ji-wei Du, PhD, Professor of Nursing; Nursing Department, The University of Hong Kong – Shenzhen Hospital, Shenzhen 518040, Guangdong Province, China. E-mail: [dujw@hku-szh.org](mailto:dujw@hku-szh.org)

**Keywords:** nursing assistants; nursing administration research; organization and administration; scoping review; evidence-based nursing

**Word Count:** 3,772.

<sup>†</sup> These authors contributed equally to this work.

## Administration approaches of nursing assistants in hospitals: a scoping review

### Abstract

**Objectives:** The administration of nursing assistants is closely associated with patient outcomes, but the current situation needs improvement. Studies evaluating intrahospital administration of nursing assistants are limited, and there is a lack of available evidence-based reviews in this field. This study aimed to identify existing literature on intrahospital nursing assistants' administration approaches.

**Design:** Scoping review.

**Search strategy:** We searched fifteen electronic databases for English and Chinese articles published between January 2011 and March 2022. Publications on administration approaches, models and appraisal tools of intrahospital nursing assistants were included.

**Results:** Thirty-six studies were eligible for the review with acceptable quality. We identified one administration model, nine administration methods, fifteen educational programs, and seven appraisal tools from the included studies. The frequency effect size analysis yielded 15 topics of the main focus at four levels, suggesting that included articles were mainly (33%) focused on the competency of nursing assistants, and the lectures were the most (80%) used strategy in quality improvement projects. Evidence from the studies was of low-to-moderate quality, indicating huge gaps between evidence-based research and management practice.

**Conclusions:** A series of practical intrahospital administration approaches was revealed, and fifteen primarily focused topics were identified. We should explore this area more thoroughly using structured frameworks and standardized methodology. This scoping review will help managers find more effective ways to improve the quality of care. Researchers may focus more on evidence-based practice in nursing assistant administration using the 15 topics as a breakthrough.

### Key words

nursing assistants; nursing administration research; organization and administration; scoping review; evidence-based nursing

### Strengths and limitations:

- (1) First scoping review of practical administration approaches for nursing assistants in hospitals.
- (2) Presenting the main topics and focus of related articles.
- (3) Development of the nursing assistant administration was widely varied among countries.
- (4) Most of the included studies were of moderate-to-low methodological quality, and a huge gap exists between evidence-based research and management practice.

## BACKGROUND

Nursing assistants (NAs) are trained allied nursing personnel who provide or assist with basic care or support under the direction of onsite licensed nursing staff.<sup>1</sup> In 2019, there were approximately 1.73 million NAs in the US, and this number in the European Union was 4.67 million in 2018,<sup>2,3</sup> indicating that NAs have become the mainstay of care. As an integral part of routine healthcare, NAs are providing more care in hospitals due to the increasing aging population and the shortage of registered nurses (RNs) in recent years,<sup>4,5</sup> thereby raising the criticality of nursing assistant administration. Nursing administration is now challenged by diverse educational backgrounds and the communication and connection between NAs and RNs.<sup>6-8</sup>

Standards and regulations of NAs have been established in several countries, e.g., OBRA 1987 Act in the US,<sup>9</sup> the Cavendish Review and other documents in the European Union,<sup>10,11</sup> and the Care Certificate in the UK.<sup>12</sup> And in China, the National Health Commission emphasized the standardized regulation of NAs in 2019, providing instructions on NA training.<sup>13</sup> However, the documents provided requirements for NA education, qualifications and training, but not for broader administration settings. There have not been uniform intrahospital NA administration regulations across countries.

The efficacy of the miscellaneous administration approaches followed by healthcare facilities was vague, leading to the grim current circumstances of NA administration. Lack of crucial competency, high turnover rate, low vocational identity, and low self-efficacy confused NAs and their administrators.<sup>14-19</sup> The faultiness of these aspects would directly affect the quality of care. A higher turnover rate was associated with fewer infection events, and the retention rate was positively linked with clinical outcomes.<sup>20,21</sup> The self-efficacy of NAs was associated with their burnout rate, which was very dangerous for care outcomes.<sup>22</sup> In addition, communication among NAs, other nursing staff and administrators also needed improvement. NAs reported discontentment with administrators' not understanding their work problems,<sup>23</sup> and the performance of NAs also was influenced by relationships among NAs, RNs and other clinical staff.<sup>24</sup>

Various definitions, duties and unbalanced development of NAs worldwide<sup>25,26</sup> have created barriers to identifying appropriate management strategies. In the US, NAs are also named certified nursing assistants (CNAs) and unlicensed assistive personnel (UAPs), and the names were nurse/nursing aides (NAs), health care assistants (HCAs) and nursing auxiliaries in the UK. Nursing attending workers (NAW) and nursing assistants (NA) were used in China.<sup>26</sup> The communication of research from different countries is always confusing, and valid approaches and practices are needed to address the current chaos.

NAs take up several care duties that directly affect the outcomes of patients in hospitals. However, much of the previous research on nursing administration was developed in long-term care settings, and limited studies have been conducted in hospitals. Due to the scarcity of primary studies, organizing systematic reviews or other evidence syntheses is challenging, and therefore scoping reviews are needed and timely to identify existing evidence and assess the feasibility of conducting evidence-based research. In this article, we reviewed available administration approaches and assessment tools for NAs in inpatient care settings, described the current progress of this field, and presented a vision for further research and evidence synthesis.

### **Aims and research questions**

This review aimed to identify, describe and synthesize current knowledge and the existing literature on nursing assistants' administration approaches and models, as well as education, skill training and multidimensional appraisal in hospitals. Two research questions were raised for intrahospital NA administration:

- What are the available approaches, models, programs, and tools?
- What are the most focused topics and most used methods of the existing studies?

## **METHODS**

### **Study Design and Protocol**

The review was conducted according to Joanna Briggs Institute (JBI) guidance and methodology for scoping review,<sup>28 29</sup> and reported using the Preferred Reporting Items for Systematic reviews and Meta-analyses – Extension for Scoping Reviews (PRISMA-ScR).<sup>27</sup> A structured protocol<sup>30</sup> was prepared a priori according to the PRISMA Protocols (PRISMA-P) 2015 statement and explanation<sup>31 32</sup> and PRISMA-ScR.

### **Eligibility Criteria**

This review was designed to identify studies which mainly focused on NAs, and discussed at least one administration-related topic. The inclusion criteria were:

- (1) Participants: nursing assistants (or certificated nursing assistants, nurse aides, etc.);
- (2) Setting: hospital;
- (3) Study type: Qualitative, quantitative, or mixed researches, evidence-based reviews, guidelines, consensus, or related dissertations;
- (4) Focus: specific approaches or models, or overall administration models, programs, tools or frameworks;
- (5) Methodology: reported clear intervention/exposure methods and evaluation tools;
- (6) Language: English or Chinese;
- (7) Peer-reviewed studies published between January 2011 and March 2022.

The exclusion criteria were: (1) Participants: other healthcare personnel, students, or orderlies; or mixed participants with different occupations, and nursing assistants were not discussed or presented separately; (2) Focus: focusing on specific areas, and the conclusions were only fit for the focused areas. (3) Setting: long-term care facilities, nursing homes, or skilled nursing facilities; and (4) Outcome: not reported key administrative outcomes.

### **Search Strategy and Study Selection**

For initial screening we retrieved comprehensive, medical, nursing and evidence-based databases as follows: medical databases (PubMed, Embase, APA PsycInfo, Wanfang Med and SinoMed); nursing databases (CINAHL and Ovid Emcare), general databases (Scopus, ProQuest and CNKI) and evidence-based practice databases (NICE, AHRQ, CADTH, JBI EBP and Cochrane DSR). The initial search was completed in November 2021, and we updated the results in March 2022.

We ran a preliminary search in PubMed to identify keywords, search fields, and related topics. We used PubMed PubReMiner<sup>33</sup> to identify related keywords for search strategy establishment. Afterward, search strategies in each database were developed, including key terms: nursing assistants, nursing aides, nursing auxiliar\*, administr\*, educat\*, training, apprais\*, organization and administration. Full search strategy is displayed in **online supplemental file 1**. References of all included studies were manually searched using terms "assistant" and "aide".

All publications were imported into EndNote 20.2 (build 15709) for citation management, and duplicates were removed. A brief screening checklist (**online supplemental file 2**) was developed for study selection to minimize the inconsistency of the reviewers. Two reviewers screened all the studies independently according to the eligibility criteria. Divergences were discussed by the reviewers together or with a third researcher.

### **Data Charting**

Article characteristics, sample size and participant demographics, focused topics, study designs and outcomes were charted from eligible studies. Two researchers designed a structured data charting tool (**online supplemental file 3**) for data charting and continuously refined it. Data charting of all eligible studies was performed by two authors independently and was corroborated by a third researcher.

### **Quality Appraisal**

The Mixed Methods Appraisal Tool (MMAT) Version 2018<sup>34, 35</sup> was applied for qualitative, quantitative or mixed-methodological studies. AMSTAR 2, a critical appraisal tool for systematic reviews<sup>36</sup>, was used for the critical appraisal of evidence-based reviews. An overall score was carried out for each included study. For the MMAT, we calculated the percentage of items answered “Yes” in Section 2, and for AMSTAR 2, after items that were not applicable were excluded, we conducted a grade of overall confidence according to the criteria by Shea et al.<sup>36</sup>

### **Data Synthesis**

Eligible studies were divided into administration approaches, education and training, and appraisal tools. We summarized the study types, main focus and detailed intervention/exposure measures for the administration, education and training fields. For studies on practical tools, detailed tool information and psychometrics were extracted. For further interpretation, we conducted a frequency effect size analysis of the area of the main focuses and intervention strategies based on the calculating effect size method from the metasummary methodology introduced by Sandelowski et al.<sup>37</sup>

### **Patient and Public Involvement Statement**

It was not appropriate or possible to involve patients or the public in the design, or conduct, or reporting, or dissemination plans of our research.

## **RESULTS**

The search identified 1,973 related studies, among which 538 were Chinese publications. 138 publications remained for full-text screening, where 103 articles were excluded (see **online supplemental file 4**). Thirty-five studies from databases were included in the scoping review, and one study published from 2011 to 2021 were manually identified from the reference lists. Ultimately, we identified 36 eligible studies<sup>38-73</sup> for our scoping review (**figure 1**).

### **Study Characteristics**

Study characteristics and contents are displayed in **table 1**. Settings, limitations, fundings and competing interests of the studies are shown in **online supplemental file 5**.

**Table 1 Study Characteristics**

| Study                                 | Type | Objective                                                                                                   | Participants and Demographics                                                                                                                              | Methodologies: Theory/ Framework, Sampling, Intervention/ Exposure, Evaluation, and Statistical methods                                                                                                                                                                                                                                                                                                  | Key Findings and Outcomes                                                                                                                                                                                                                                                                                                                                                                                                                                                                                                                                                                                                                                               |
|---------------------------------------|------|-------------------------------------------------------------------------------------------------------------|------------------------------------------------------------------------------------------------------------------------------------------------------------|----------------------------------------------------------------------------------------------------------------------------------------------------------------------------------------------------------------------------------------------------------------------------------------------------------------------------------------------------------------------------------------------------------|-------------------------------------------------------------------------------------------------------------------------------------------------------------------------------------------------------------------------------------------------------------------------------------------------------------------------------------------------------------------------------------------------------------------------------------------------------------------------------------------------------------------------------------------------------------------------------------------------------------------------------------------------------------------------|
| Appleby <sup>18</sup> (2019) the UK   | MMS  | Nurses' and HCAs' intentions to implement a "care round checklist"                                          | N= 270<br>270 nurses and HCAs;<br>40% HCAs, approx. 110<br>Response rate 38%                                                                               | Theory: The Theory of Planned Behavior;<br>Scale Development: semi-structured qualitative interview;<br>Scoring: Likert scale;<br>Statistical Method: exploratory factor analysis; correlations                                                                                                                                                                                                          | Key Findings and Outcomes<br>(1) A 66-item questionnaire to measure nurses' and HCAs' intentions was developed and consistency reliability was achieved.<br>(2) The questionnaire explained 24.2% of HCAs' intentions, which were predicted by attitude and practice habits.<br>(3) Positive beliefs of HCAs towards implementing the checklist were associated with patients, colleagues, delegation and communication. One negative was distraction, and effective use of the checklist depended on staff numbers.<br>Manager influence had a strong relationship with overall perceptions of safety regardless of the relational quality perceptions of RNs and NAs. |
| Campbell <sup>19</sup> (2021) the US  | O    | Relational quality of RN and NA, and manager's influence on the quality and patient safety                  | N= 1152<br>889 RNs and 263 NAs;<br>from 53 fulltime inpatient units                                                                                        | Database: hospital survey on patient safety culture survey results;<br>Evaluation: LMX-7 questionnaire to evaluate relational quality, and a four-dimension manager to influence composite measures derived from AHRQ survey composites;<br>Statistical Method: paired t test.                                                                                                                           | Manager influence had a strong relationship with overall perceptions of safety regardless of the relational quality perceptions of RNs and NAs.                                                                                                                                                                                                                                                                                                                                                                                                                                                                                                                         |
| Campbell <sup>19</sup> (2020) the US  | ES   | Interventions for teamwork, delegation and communication between RNs and NAs                                | Seven studies on NAs, RNs, and LPNs                                                                                                                        | Methodology: integrative review;<br>Searching: PRISMA;<br>Critical Appraisal: mixed methods appraisal tool (MMAT) and SQUIRE 2.0                                                                                                                                                                                                                                                                         | (1) A multi-construct approach to promote teamwork, communication and/or delegation was essential.<br>(2) Teams STEPPS, crew resource management and simulation or other teamwork enhancement activities were effective for promoting teamwork.<br>(3) Lecture format with multiple modalities, improving of shift process by SBART, role-play, simulation and virtual training would help improve communication.<br>(4) Avatars in a virtual hospital and a traditional lecture based on ANA principles including role-playing would influence delegation.                                                                                                             |
| Dutton <sup>11</sup> (2020) the US    | PPT  | The utilization, satisfaction and effect of a web-based stress management program (BREATHE)                 | N= 31<br>31 nursing staff, of which 6 CNAs.<br>F:M 29:2<br>Majority age 30-49, ethnicity Black, diploma baccalaureate                                      | Theory: the translation framework Knowledge to Action for developing the project;<br>Intervention: web-based survey and 2-month web-based intervention using the program;<br>Evaluation: Nurse Stress Scale for measuring stress;<br>Statistical Method: paired t test                                                                                                                                   | (1) BREATHE program could support nurses to manage their stress.<br>(2) Death and dying, conflict with MD, workload and uncertainty related to treatment were improved by the BREATHE program, while other subscales showed no significant improvement.                                                                                                                                                                                                                                                                                                                                                                                                                 |
| Dykes <sup>9</sup> (2011) the US      | MMS  | Developing and testing the Self Efficacy for Preventing Falls - Nurse/Assistant (SEPPN/SEPPA) scales        | N= 83<br>27 CNAs in Phase I and III, 269 CNAs in the survey, 83 were included in the data analysis                                                         | Theory: classical measurement theory;<br>Scale Development: focus groups for Phase I and III, and reliability test in Phase IV;<br>Scale Scoring: six-point Likert system;<br>Sampling: snowball;<br>Statistical Method: independent and paired t test, and Cronbach's $\alpha$ for consistency reliability                                                                                              | SEPPN/SEPPA scales achieved psychometric adequacy and were recommended to measure self-efficacy beliefs in preventing falls.                                                                                                                                                                                                                                                                                                                                                                                                                                                                                                                                            |
| Feng <sup>21</sup> (2013) China       | O    | Working conditions of NAs employed by hospital or company                                                   | N= 538<br>538 NAs in 10 hospitals                                                                                                                          | Evaluation: questionnaire on demographics, vocational identity and stability, and working satisfaction<br>Statistical Method: chi square test                                                                                                                                                                                                                                                            | NAs employed by hospital only had significant differences on age (younger), education background, vocational stability and identity, and working satisfaction (all better) between those employed by company.                                                                                                                                                                                                                                                                                                                                                                                                                                                           |
| Friesen <sup>44</sup> (2019) Canada   | ES   | Evidence on collaborative or interdisciplinary palliative education strategies for HCAs                     | 16 studies on HCAs, from the UK, the US, Canada, and Australia                                                                                             | Qualitative meta-summary                                                                                                                                                                                                                                                                                                                                                                                 | Six implications for implementing a collaborative palliative educational works hop: previewing teaching process with HCAs a priori; the content should be practical; all HCAs should attend; ensuring the benefits were transferable to care settings; ensuring HCAs were able to use newly acquired skills; and choosing education strategies that HCAs favoured.                                                                                                                                                                                                                                                                                                      |
| Gao <sup>25</sup> (2017) China        | PPT  | Effectiveness of dual management model (by hospital and company) on NAWs                                    | N= 1,344 patients                                                                                                                                          | Intervention: NAs from companies were dual managed by hospital (hospital - nursing department - care unit) and company;<br>Evaluation: a questionnaire on competency, patient satisfaction, complaints, execution of duties, and compliance with hospital regulations;<br>Statistical Method: Cronbach's $\alpha$ and Spearman correlation for reliability and validity, and chi square test for results | (1) There was a significant increase in working competency and patient's satisfaction after a dual-management intervention.<br>(2) There was no significant decrease in complaint events after the intervention.                                                                                                                                                                                                                                                                                                                                                                                                                                                        |
| Geoffriom <sup>26</sup> (2020) Canada | ES   | The effectiveness of education and training methods to prevent workplace aggression                         | N= 1,688<br>Nine studies with 1,688 HCWs                                                                                                                   | Cochrane Handbook for Systematic Reviews of Interventions                                                                                                                                                                                                                                                                                                                                                | (1) Evidence on education to prevent workplace aggression was mixed. Participants may not benefit from education on preventing aggression.<br>(2) Education may increase HCWs' personal knowledge and positive attitudes on aggression.<br>(3) Education may not have effects on skills and adverse outcomes on aggression.                                                                                                                                                                                                                                                                                                                                             |
| Haiqin <sup>27</sup> (2019) the UK    | MMS  | Impact of the Care Certificate on the HCAs                                                                  | N= 11<br>11 HCAs                                                                                                                                           | Evaluation: a mixed methods 18-item questionnaire on feedback of the Care Certificate;<br>Statistical Method: only descriptive                                                                                                                                                                                                                                                                           | (1) Most participants found the Care Certificate to be of benefit, regardless of experience or education background;<br>(2) It was uncertain if the Care Certificate made a difference to HCAs' practice.                                                                                                                                                                                                                                                                                                                                                                                                                                                               |
| Haraldsson <sup>9</sup> (2021) Sweden | O    | To compare a questionnaire with technical measurements (electromyography) on assessment of workload of CNAs | N= 16<br>16 CNAs, F:M 15:1<br>Median (min-max): weight 62 (56-92) kg, height 164 (158-181) cm, working time 475 (457-504) min, break time 66.5 (50-95) min | Evaluation: the Structured Multidisciplinary Evaluation Tool (SMET); surface electromyography to assess workload;<br>Statistical Method: correlation matrix                                                                                                                                                                                                                                              | (1) There are significant correlations between the SMET questionnaire and surface electromyography outcomes.<br>(2) There are correlations between the inclinometer measures of upper back flexion and self-estimation of work support and demands.                                                                                                                                                                                                                                                                                                                                                                                                                     |
| Kennerly <sup>99</sup> (2012) the US  | O    | Psychometric properties of the Nursing Culture Assessment Tool                                              | N= 340<br>340 RNs, LPNs and CNAs<br>CNA Response rate: 10%<br>F:M 318:22<br>38.8% working in acute care settings<br>Working experience median 15.23 yrs    | Theory: the polytomous universal model;<br>Sampling: convenience sampling via mail;<br>Evaluation: the Nursing Culture Assessment Model;<br>Statistical Method: Cronbach's $\alpha$ for consistency reliability, exploratory factor analyses for validity, logistic regression for differential item functioning                                                                                         | (1) Reliability and validity of all subscales and the overall tool were achieved regardless of whether nursing professionals to use it.<br>(2) All subscales can be interpreted individually.                                                                                                                                                                                                                                                                                                                                                                                                                                                                           |
| Lee <sup>10</sup> (2018) the US       | MMS  | An education program on safe patient handling and mobility                                                  | N= 236<br>224 nursing staff in pilot education, and 12 in house-wide education. 281 course trainers and 98 coaches were trained for the program            | Intervention: 3-phase development of the education program: pilot, house-wide and ongoing education;<br>Evaluation: descriptive and qualitative evaluation                                                                                                                                                                                                                                               | A 4 to 8-hour education program aimed at safe transfer, patient mobility and prevention of nursing staff's injury was developed including prework, application, trainer and peer coach courses, through on-line learning, demonstration, skill evaluation and coaching.                                                                                                                                                                                                                                                                                                                                                                                                 |
| Liu <sup>11</sup> (2017) China        | PPT  | Effectiveness of a comprehensive administrative approach of NAWs on patient and RN's satisfaction           | N= 150<br>150 NAWs,<br>(Mean±SD)<br>age 48.72±4.56<br>working experience 3.53±0.97 yrs                                                                     | Intervention: a management model, where NAWs were managed by the nursing department, head nurses and RNs triply, and a refined prejob, enrolment and continuing education system;<br>Evaluation: a questionnaire on attitude, ward environment and care quality;<br>Statistical Method: Cronbach's $\alpha$ for reliability, and t test for outcomes                                                     | The novel management model significantly improved patient and RN's satisfaction on NAWs, and reduced unreasonable charge events of NAWs.                                                                                                                                                                                                                                                                                                                                                                                                                                                                                                                                |
| Ma <sup>12</sup> (2019) China         | PPT  | Effectiveness of failure modes and effects analysis (FMEA) method in NAW administration                     | N= 50<br>50 NAWs in a ward                                                                                                                                 | Intervention: improving of job responsibilities, prework and continuing education, and quality control according to the FMEA scoring;<br>Evaluation: FMEA scoring on severity, occurrence and detection;<br>Statistical Method: independent t test                                                                                                                                                       | The FMEA method ran well in NAW administration, with the intervention according to FMEA significantly improving severity, occurrence and detection scores.                                                                                                                                                                                                                                                                                                                                                                                                                                                                                                              |
| McKenzie <sup>13</sup> (2013) the UK  | Qual | Effect of a simulation-based education program on HCAs                                                      | N= 6<br>6 HCAs having attended the Crisis Avoidance and Resource Management                                                                                | Intervention: the Crisis Avoidance and Resource Management program;<br>Qualitative Evaluation: Focus groups; semistructured interview                                                                                                                                                                                                                                                                    | (1) Four themes (role of HCA, realism and learning through simulation, impact of simulation on patient safety, and program structure) were identified from the focus group.<br>(2) The simulation course (the Crisis Avoidance and Resource Management) was positively received by HCAs, and was beneficial for knowledge, confidence, team-working, communication and patient safety.                                                                                                                                                                                                                                                                                  |
| Monteiro <sup>14</sup> (2011) Brazil  | Q    | Work capacity of NAs                                                                                        | N= 651<br>651 participants, of which 241 NAs<br>F:M 83:17<br>Mean age 39.9<br>Response rate 89.4%                                                          | Evaluation: the Work Ability Index;<br>Statistical Method: univariate and multiple logistic regression                                                                                                                                                                                                                                                                                                   | Age, body mass index, and duration of the work were associated with work ability (capacity).                                                                                                                                                                                                                                                                                                                                                                                                                                                                                                                                                                            |
| Nie <sup>15</sup>                     | PT   | Effectiveness of a group collaborative                                                                      | N= 60                                                                                                                                                      | Intervention: lecture, practical training and simulation study (intragroups, including cardiopulmonary resuscitation, living care and clinical care);                                                                                                                                                                                                                                                    | (1) 90% of NAs passed the competency test, with an average score of 88.51 out of 100.                                                                                                                                                                                                                                                                                                                                                                                                                                                                                                                                                                                   |

| Study                                | Type | Objective                                                                             | Participants and Demographics                                                                                     | Methodologies: Theory/Framework, Sampling, Intervention/Exposure, Evaluation, and Statistical methods                                                                                                                                                                                                                                                                                                                                                                                         | Key Findings and Outcomes                                                                                                                                                                                                                                                                                     |
|--------------------------------------|------|---------------------------------------------------------------------------------------|-------------------------------------------------------------------------------------------------------------------|-----------------------------------------------------------------------------------------------------------------------------------------------------------------------------------------------------------------------------------------------------------------------------------------------------------------------------------------------------------------------------------------------------------------------------------------------------------------------------------------------|---------------------------------------------------------------------------------------------------------------------------------------------------------------------------------------------------------------------------------------------------------------------------------------------------------------|
| [2017] China                         |      | training model for NAs                                                                | 60 NAs, F:M 78:21 (Mean±SD) Age 41.5±9.35                                                                         | Evaluation: practical test, patient and clinical professionals' satisfaction of NA working, and NAs' approval rate of the education program                                                                                                                                                                                                                                                                                                                                                   | (2) More than 90% of patients, clinical professionals and NAs approved of the education program.                                                                                                                                                                                                              |
| Nergaard <sup>6</sup> [2012] Denmark | PPT  | Development and effectiveness of a training program for communication skills          | N=148<br>181 participants, of which 30 NAs, and 148 completed entire process<br>F:M 86:14                         | Theory and Model: the Calgary-Cambridge Observation Guide; the self-efficacy theory;<br>Intervention: a 3-day training program;<br>Qualitative Evaluation: focus group interview for training contents and questionnaire;<br>Quantitative Evaluation: a 19-item self-efficacy questionnaire;<br>Statistical Method: paired t-test and linear regression                                                                                                                                       | (1) A 3-day training program on communication with patients and colleagues was developed.<br>(2) The training program significantly improved communication skills and self-efficacy, which was durable, persisting six months after the training.                                                             |
| Pfeifer <sup>17</sup> [2018] the US  | MMS  | Effect of an education program on dementia patients' care                             | N=428<br>428 CNAs                                                                                                 | Intervention: a one-hour dementia education program;<br>Qualitative Method: two open-ended questions;<br>Quantitative Method: a three-item Likert-type questionnaire                                                                                                                                                                                                                                                                                                                          | (1) A multimodal education program for CNAs on dementia was developed.<br>(2) The dementia education program made a significant improvement on CNAs' knowledge and communication skills on dementia.                                                                                                          |
| Prestia <sup>8</sup> [2012] the US   | PPT  | Effect of a care partner program on relationships between CNAs and patients           | All CNAs in a 333-bed hospital                                                                                    | Theory: Caring theory<br>Intervention: a one-day care partner program, including discussion, expectations, FISHP philosophy and video, the ADET tool (acknowledge, introduce, duration, explain and thank) and interactions;<br>Evaluation: a patient satisfaction score from the Hospital Consumer Assessment of Healthcare Providers and System survey                                                                                                                                      | The care partner program significantly increased hospitals' scores of patient satisfaction.                                                                                                                                                                                                                   |
| Qiu <sup>19</sup> [2020] China       | PPT  | Application of Activities of Daily Living Scale in NA administration                  | N=162<br>162 NAs (Mean±SD)<br>Age 44.6±6.9                                                                        | Intervention: Patients who need NA care were divided into four grades according to Activities of Daily Living Scale scores, and NAs provided different care according to the score;<br>Evaluation: questionnaires on patient and nursing personnel's satisfaction on NA care quality, NAs' satisfaction, and NA turnover rate;<br>Statistical Method: Cronbach's $\alpha$ for reliability, and Mann-Whitney U test and chi-square test for outcomes                                           | Patient, nursing personnel and NAs' satisfaction were all significantly improved after intervention, and NA turnover rate was decreased.                                                                                                                                                                      |
| Ritchie <sup>40</sup> [2017] the UK  | PPT  | Effect of a quality improvement education program on restorative care practice        | N=36<br>36 NAs and all patients in their wards                                                                    | Theory and Model: 4Es (engage, educate, execute and evaluate) model, and QI (quality improve) process;<br>Intervention: a didactic study day and a three-to-four-hour ward-based practice session, taught by a physical therapist;<br>Evaluation: independent observation and scoring of pre- and post-intervention care events; Barthel and Abbreviated Mental Test scales for patients                                                                                                      | (1) The training program significantly increased restorative care events and decreased the number of patients receiving no NA-led restorative care.<br>(2) Patient characteristics (Barthel scores and Abbreviated Mental Test scores), beds occupancy and recupering rates showed no significant difference. |
| Small <sup>61</sup> [2012] the US    | PPT  | Development of a continuing education program for patient care technicians            | N=29<br>approx. 15 RNs and 14 patient care technicians                                                            | Intervention: education sessions and teaching plans were developed by RNs;<br>Evaluation: four-point Likert scales on teamwork, peer support and communication, and open questions on the topic were asked                                                                                                                                                                                                                                                                                    | A continuing inpatient education program for patient care technicians was developed, and the feedback was positive.                                                                                                                                                                                           |
| Swann <sup>52</sup> [2018] the US    | O    | Education and recognition to improve NAs' retention                                   | Approx. 700 NAs                                                                                                   | Theory: Imogene King's Theory of Goal Attainment;<br>Intervention: CNA orientation coaches (6% NAs took part);<br>Evaluation: a retrospective descriptive survey to measure retention rate of NAs, one year prior to and after the intervention                                                                                                                                                                                                                                               | (1) The turnover rate did not decrease significantly after the intervention.<br>(2) The Imogene King's Theory (including stress, body image and self-growth) was not supported and not applicable on NA retention, by the research outcome.                                                                   |
| Tom <sup>62</sup> [2016] the US      | PPT  | Development and effectiveness of a patient safety aide training orientation program   | N=32<br>32 patient safety aides                                                                                   | Theory: Jean Watson's Theory of Human Caring;<br>Intervention: a two-day safety aide training orientation, competency and validation program in Durham Veterans' Affairs Medical Center (DVA MC);<br>Evaluation: a six-item patient safety aides survey, five-item DVA MC evaluation, and monthly patient elopement and falls incidents;<br>Statistical Method: paired t-test                                                                                                                 | (1) The program significantly improved the preparedness and decreased the fall events, while patient elopement did not show a significant decrease.<br>(2) The training program may help maximize cost-effectiveness.                                                                                         |
| Twigg <sup>64</sup> [2016] Australia | O    | Impact of adding AINs to acute care ward on adverse patient outcome                   | 33 AIN wards and 31 non-AIN wards, 256,302 records of patients                                                    | Theory: the Patient Care System Model;<br>Exposure: AIN introduced in the hospital;<br>Evaluation: CBA within ward type, and posttest evaluation between AIN and non-AIN type;<br>Statistical Method: odds ratio                                                                                                                                                                                                                                                                              | (1) The adding of AIN significantly increased failure to rescue, urinary tract infection, and falls with injury, while it decreased mortality.<br>(2) There were no decreases on adverse events for patients spending more time on AIN wards.                                                                 |
| Wagner <sup>65</sup> [2018] the US   | PPT  | Development and effectiveness of a delegation-communication learning program          | N=37<br>14 UAPs and 23 RNs (for UAP) F:M 71:29, age 18 to 59, high school diploma 29%, vocational certificate 29% | Intervention: A lecture-format program including principles, case scenarios and examples;<br>Evaluation: independent observation for baseline survey, and a questionnaire from the Hopkins Learning Needs Assessment and the Karnested and Bragadottir delegation for RNs and UAPs; the National Database of Nursing Quality Indicators and the Press-Ganey patient satisfaction levels for patient outcome;<br>Statistical Method: independent t-test                                        | (1) The intervention improved the unit fall rate and pressure injury rate.<br>(2) All but one item "losing respect because of delegation" showed no significant improvement after intervention.<br>(3) Staff favoured a hard-copy format to review the lecture while working.                                 |
| Ward <sup>66</sup> [2014] the US     | PPT  | Development of a continuing education program for CNAs                                | N=130<br>approx. 130 CNAs                                                                                         | Intervention: educational offering on the run (eDOOR) program, using eye-catching flyers, a one-hour simulation skills lab, and a mini-in-service;<br>Evaluation: needs assessment survey, and a 10-item CNA knowledge test                                                                                                                                                                                                                                                                   | (1) A program for CNA continuing education was developed, including eDOOR methods and simulation, and received positive responses from CNAs.<br>(2) There was no significant increase in the CNA knowledge test scores.                                                                                       |
| Wilson <sup>67</sup> [2011] the US   | PPT  | Development and effectiveness of a patient handling education program for NAs         | N=254<br>254 NAs<br>F:M approx. 10:1<br>age 18 to 61                                                              | Intervention: an eight-hour education program, including lectures and simulation taught by health care professionals and physical therapists;<br>Evaluation: a 10-item knowledge test and a 10-item confidence and comfort level in handling patient and transfer questionnaire;<br>Statistical Method: paired t-test, Wilcoxon rank test and Spearman correlation                                                                                                                            | (1) An education program, including patient transfer, lifting, ambulating and braces and prostheses in the form of lecture and simulation was developed.<br>(2) The program can significantly improve NAs' knowledge, confidence and comfort on patient handling.                                             |
| Wu <sup>68</sup> [2015] China        | PPT  | Effectiveness of hospital management and training of NAWs                             | N=65<br>65 NAWs<br>F:M 62:38<br>55% primary school background                                                     | Intervention: a holistic management system including: NAW management centre, hospital regulations, continuing education, information system and software, charge scales, and humanized management;<br>Evaluation: NAW competency test, and patient and clinical professionals' satisfaction                                                                                                                                                                                                   | (1) Skills and knowledge of NAWs was significantly improved after intervention.<br>(2) Satisfaction of patients and clinical professionals was improved.                                                                                                                                                      |
| Yue <sup>9</sup> [2015] China        | PPT  | Effectiveness of applying Quality Control Circle to NAWs' hand hygiene administration | N=9<br>9 NAWs in a psychiatric ward                                                                               | Intervention: Quality Control Circle for continuing quality improvement, and fishbone diagram for analysing reasons. Education, facility improving, and hand hygiene monitoring was used for increased compliance of hand hygiene of NAWs;<br>Evaluation: independent observation of hand washing times, points, and methods; a hand hygiene compliance questionnaire; colony forming units at hand surface after hand washing                                                                | The Quality Control Circle method improved NAWs' hand hygiene situation and compliance significantly.                                                                                                                                                                                                         |
| Zhao <sup>69</sup> [2020] China      | PPT  | Effectiveness of a patient-oriented stratified training model for NAs                 | N=75<br>75 NAs<br>F:M 51:24<br>(Mean±SD)<br>Age 50.7±3.4<br>Working experience 2.31±1.2 yrs                       | Intervention: a training work group for development of training program; Barthel Scale for four-grade stratification of patients, and a three-grade occupation certificate for NAs with different training contents and hours;<br>Evaluation: NA knowledge and skill exam, and patient and nursing professionals' satisfaction on NAs                                                                                                                                                         | (1) A stratified, patient-oriented NA management approach was identified.<br>(2) There was significant improvement on NA competency, and patient and nursing professionals' satisfaction after the training model set on.                                                                                     |
| Zhi <sup>71</sup> [2021] China       | O    | Patient satisfaction under different administration models of NA                      | 144 hospitals, 6211 patients                                                                                      | Evaluation: a 5-item Likert scale on satisfaction;<br>Statistical Method: Mann-Whitney U test and Kruskal-Wallis test for demographics and satisfaction, chi-square test and binary logistic regression for different models                                                                                                                                                                                                                                                                  | (1) Satisfaction for NAs under the direct hospital management model was higher than under others (commercial company, company-hospital joint, and self-employed).<br>(2) Patients with higher family income tended to score higher.                                                                           |
| Zhu D. <sup>72</sup> [2021] China    | PT   | Self-protection on training of NAWs during COVID-19 pandemic                          | N=37<br>37 NAWs<br>F:M 35:2<br>(Mean±SD)<br>Age 49.38±7.98<br>Working experience 3.14±2.09 yrs                    | Theory: Kirkpatrick Model - reaction, learning, behaviour and result (4R);<br>Intervention: a "dual feedback, tertiary training and four-level evaluation" training model including a training work group, training taught by company, nursing department and wards about protection skills and knowledge using video and lecture, and a practical exam;<br>Evaluation: NAW satisfaction, practical exam, independent observation of self-protection behaviour, and nosocomial infection rate | (1) 100% of the NAWs were satisfied with the training program, with a mean score of 91.6 out of 100 on the competency exams.<br>(2) 94.59% of the NAWs followed self-protection behaviour instructions, and no infection events occurred in the three months after training.                                  |
| Zhu F. <sup>73</sup> [2019] China    | PPT  | An information sheet for patients to make NAWs' care known better                     | N=39<br>39 NAWs, 55 participants<br>F:M of NAW 29:10                                                              | Intervention: an information sheet from NAWs to patients, including: what to care, what not to do, how to care, responsibilities of NAWs, and personalized care;<br>Evaluation: awareness rate of NAW routing works, and satisfaction of patients                                                                                                                                                                                                                                             | The information sheet can significantly improve NAWs' awareness of regulation, safety and patient privacy, and patients were more satisfied with NAWs.                                                                                                                                                        |

HCA, health care assistant; approx., approximately; PBC, perceived behavioural control; RN, registered nurse; NA, nursing assistants (or nursing aides); NAW, nursing attending worker; N/A, not applicable; LPN, licensed practical nurse; CNA, certified nursing assistant; F:M, female to male ratio; HCW, healthcare workers; AIN, assistant in nursing; UAP, unlicensed assistive personnel; yrs, years. For study types: MMS, mixed methods study; O, observational quantitative study; ES, evidence synthesis; PPT, pre- and post-test quantitative study; Qual, qualitative study; PT, post-test quantitative study.

The articles were mainly from the US and China, and 22 of 36 studies were published in the last five years (2017-2022). Two theses, three evidence syntheses and 31 original research papers were included. 25 articles presented quantitative designs (17 interventional and eight descriptive), one was qualitative, and seven studies employed mixed methods. Most studies (19 of 24) with interventions applied a quasi-experimental, pre- and post-test design, while one study<sup>57</sup> presented a retrospective post-then-pretest design.<sup>74</sup> Focus group interviews were the most employed method in qualitative and mixed methods studies. The three evidence syntheses were in different types: one integrated review,<sup>40</sup> one qualitative metasummary,<sup>44</sup> and one systematic review.<sup>46</sup>

All 33 original studies were conducted in hospitals due to our inclusion criteria, and the sample size ranged from six to 700 NAs. Three studies<sup>45 64 71</sup> were focused on patients' attitudes, and did not report the demographics of NAs. Only one study<sup>54</sup> reported a higher than 60% response rate, while others ranged from 10% to 40%.

The methodological quality appraisal results of the studies are listed in **online supplemental file 6**. The mean score of all 33 original studies assessed by the MMAT reached a level of 65%, and for evidence-based reviews, two of the studies<sup>40 44</sup> received a "very low" rating, while the other one<sup>46</sup> got a "high". Overall, the methodological quality of the included studies was considered acceptable.

### Approaches and Models

Fourteen studies addressed various administration approaches and focuses, as listed in **table 2**. The development of NA administration in China was still preliminary, and articles by Chinese researchers were more fixated on employment models. Five studies<sup>43 45 51 68 71</sup> were aimed at the change of management and employment from company-led to hospital-led, or double-track, with consistently positive results on satisfaction and NA/NAW working competency after intervention. Other original studies identified four practical tools or methods, i.e., the Failure Mode and Effects Analysis (FMEA),<sup>52</sup> the Activities of Daily Living (ADL) scale,<sup>59</sup> the Quality Control Circle,<sup>69</sup> and an information sheet to patients,<sup>73</sup> as well as two programs on stress and CNA-patient relationships.<sup>41 58</sup>

Negative outcomes were found in turnover rates after a CNA orientation coach<sup>62</sup> and in adverse events with the addition of AINs to acute wards.<sup>64</sup> Meanwhile, several approaches, including crew resource management, the TeamSTEPPS program,<sup>75</sup> and the SBART shift model, were summarized by an integrated review from Campbell et al.<sup>40</sup>

### Education and Training Programs

Each of the 13 research papers developed an education program with different topics, while two evidence reviews<sup>44 46</sup> discussed educational strategies on palliative care and workplace aggression with wide availability (**table 2**). NA knowledge and skills were most emphasized. Six studies highlighted five aspects of NA competency: patient handling,<sup>50 67</sup> palliative care,<sup>44</sup> dementia,<sup>57</sup> restorative care<sup>60</sup> and routine work capacity.<sup>55</sup> Of other studies, two<sup>53 63</sup> improved patient safety, two<sup>56 65</sup> were on communication, two<sup>61 66</sup> pointed to continuing education and the other two<sup>46 72</sup> focused on self-protection. The strategies taken ranged from classical lectures to web-based learning, simulation and practical training. The mixed outcome of education on workplace aggression was reviewed by Geoffrion et al.,<sup>46</sup> addressing the need of further study in this area.

### Appraisal Tools

We found seven valid appraisal tools for NA administration with stable psychometrics from the included studies (**table 2**):

- (1) HCA & RNs' intention questionnaire;<sup>38</sup>
- (2) LMX-7 relational quality questionnaire from Campbell et al.<sup>39</sup> and developed by Graen et al.;<sup>76</sup>
- (3) NA working questionnaire<sup>47</sup>;
- (4) the Nursing Culture Assessment Tool (NCAT);<sup>49</sup>
- (5) the Structured Multidisciplinary Evaluation Tool (SMET) from Haraldsson et al.<sup>48</sup> and developed by the author in 2016;<sup>77</sup>
- (6) Self-Efficacy for Preventing Falls – Assistants (SEPFA);<sup>42</sup>
- (7) the Work Ability Index from Monteiro et al.<sup>54</sup> and produced by Ilmarinen.<sup>78</sup>

Three of seven papers developed original scales and tested reliability and validity. Four studies examined the psychometrics of existing questionnaires or applied questionnaires to NA administration and reported eligible outcomes. The main focuses ranged from working capacity and workload to relationships, intentions and nursing culture.

**Table 2** Administration approaches, training & education programs, appraisal tools and main focuses (*n* = 36)

| Theme 1: Administration approaches ( <i>n</i> = 14) |                                                                             |                                                                                                                                                                                                                                                                          |                                                                                                                                                                                                                                               |
|-----------------------------------------------------|-----------------------------------------------------------------------------|--------------------------------------------------------------------------------------------------------------------------------------------------------------------------------------------------------------------------------------------------------------------------|-----------------------------------------------------------------------------------------------------------------------------------------------------------------------------------------------------------------------------------------------|
| Study                                               | Main focus                                                                  | Program/Model                                                                                                                                                                                                                                                            | Contents                                                                                                                                                                                                                                      |
| Campbell <sup>40</sup><br>(2020) †                  | teamwork<br>communication                                                   | Crew Resource management;<br>TeamSTEPPS; <sup>75</sup><br>SBART for shift;<br>ANA principles                                                                                                                                                                             | not applicable. (This integrated review reported five programs and virtual simulation scenarios from the previous studies.)                                                                                                                   |
| Dutton <sup>41</sup><br>(2020)                      | stress                                                                      | BREATHE stress management program                                                                                                                                                                                                                                        | six modules including introduction of stress, assessing stress, identifying stressors, managing stress, avoiding negative coping, and mental health.                                                                                          |
| Feng <sup>43</sup><br>(2013)                        | vocational identity<br>work satisfaction                                    | hospital-only employment model                                                                                                                                                                                                                                           | NAWs were only employed by hospitals and were managed by the nursing department.                                                                                                                                                              |
| Gao <sup>45</sup><br>(2017)                         | competency<br>patient satisfaction                                          | dual employment mode by hospital and company                                                                                                                                                                                                                             | a tertiary management from hospital: the hospital president, the nursing department and wards head nurse; NAW group leader and head nurse management in wards; and the company management.                                                    |
| Liu <sup>51</sup><br>(2017)                         | patient satisfaction<br>nurse satisfaction                                  | three-level comprehensive management model                                                                                                                                                                                                                               | a three-level nursing department – head nurse – bed nurse management modal, including regulation and responsibilities, NAW prework training, performance incentive mechanism and care quality control standards.                              |
| Ma <sup>52</sup><br>(2019)                          | job responsibility<br>care quality control                                  | FMEA model                                                                                                                                                                                                                                                               | a FMEA group including head nurses and hospital managers scored the severity, detection and occurrence, and then found approaches to solve the problem.                                                                                       |
| Prestia <sup>57</sup><br>(2012)                     | relationships of CNAs and patients<br>patient satisfaction                  | Care partner program                                                                                                                                                                                                                                                     | a shared mental model education was conducted, including seven aspects on expectations, discussion of current care, teaching of relationships building, discussion on patient experiences, education on the HCAHPS and caring skill stations. |
| Qiu <sup>59</sup><br>(2020)                         | patient satisfaction<br>NA satisfaction<br>turnover/retention               | Activities of Daily Living (ADL) Scale stratified and management model                                                                                                                                                                                                   | ADL was used to stratify patients and NAW care contents into four levels so as to make care and charge standards                                                                                                                              |
| Swann <sup>62</sup><br>(2018)                       | turnover/retention                                                          | CNA orientation coaches                                                                                                                                                                                                                                                  | a two-hour program on clinical and emergency skills                                                                                                                                                                                           |
| Twigg <sup>64</sup><br>(2016)                       | adverse patient outcome                                                     | adding AINs to acute wards                                                                                                                                                                                                                                               | not applicable                                                                                                                                                                                                                                |
| Wu <sup>68</sup><br>(2015)                          | competency<br>patient satisfaction<br>clinical professional satisfaction    | a holistic NAW-centered management model                                                                                                                                                                                                                                 | NAWs received unified management from NAW center. Regulations, working formulations, continuing education, care quality control by 360-degree evaluation, application of information system and humanized management were used.               |
| Yu <sup>69</sup><br>(2015)                          | hand hygiene                                                                | Quality Control Circle (QCC)                                                                                                                                                                                                                                             | a QCC group for observing and analyzing NAW's hand hygiene. Fish bone diagram for analyzing factors of low compliance, and brainstorm for intervention methods. Education, facilities adding, and everyday detection was used for improving.  |
| Zhi <sup>71</sup><br>(2021)                         | patient satisfaction                                                        | direct hospital management model                                                                                                                                                                                                                                         | NAWs were only employed by hospitals and were managed by the nursing department or NAW center.                                                                                                                                                |
| Zhu <sup>73</sup><br>(2019)                         | awareness of work contents<br>patient satisfaction                          | informed sheet                                                                                                                                                                                                                                                           | the inform sheet contained care requirements and personalized requirements, signed by both NAWs and patients and leaving to patients.                                                                                                         |
| Theme 2: Education and training ( <i>n</i> = 15)    |                                                                             |                                                                                                                                                                                                                                                                          |                                                                                                                                                                                                                                               |
| Study                                               | Main focus                                                                  | Educational strategy                                                                                                                                                                                                                                                     |                                                                                                                                                                                                                                               |
| Friesen <sup>44</sup><br>(2019) †                   | palliative care                                                             | collaborative or intradisciplinary palliative education strategies from 16 studies, methods including lectures, case studies, practical training, learning groups, role play, discussions, slide presentations, web-based learning, workshops, and feedback discussions. |                                                                                                                                                                                                                                               |
| Geoffrion <sup>46</sup><br>(2020) †                 | workplace aggression                                                        | education interventions from nine studies, methods including online learning, group discussions, lectures, videos, simulation, and role play.                                                                                                                            |                                                                                                                                                                                                                                               |
| Lee <sup>50</sup><br>(2018)                         | patient handling and mobility                                               | a four- to eight-hour online and face-to-face education program for nursing staff taught by trained coaches.                                                                                                                                                             |                                                                                                                                                                                                                                               |
| McKenzie <sup>53</sup><br>(2013)                    | patient safety                                                              | the Crisis Avoidance and Resource Management using scenarios, taught by senior nurses.                                                                                                                                                                                   |                                                                                                                                                                                                                                               |
| Nie <sup>55</sup><br>(2017)                         | knowledge and skills<br>patient, clinical professionals and NA satisfaction | a group collaborative training, including lectures, practical training, simulation, and group role-play.                                                                                                                                                                 |                                                                                                                                                                                                                                               |
| Nørgaard <sup>56</sup><br>(2012)                    | communication                                                               | a three-day training program using role play, lectures, discussions, and communication practice, with a six months interval between the first two days and the last day.                                                                                                 |                                                                                                                                                                                                                                               |
| Pfeifer <sup>57</sup><br>(2018)                     | dementia                                                                    | a one-hour dementia education program using lectures, videos, and scenarios.                                                                                                                                                                                             |                                                                                                                                                                                                                                               |
| Ritchie <sup>60</sup><br>(2017)                     | restorative care                                                            | a didactic day and a three-to-four-hour practice session, using lectures and practical training, taught by a physical therapist.                                                                                                                                         |                                                                                                                                                                                                                                               |
| Small <sup>61</sup>                                 | continuing education                                                        | a continuing and normalized education program based on teaching plans from RNs at shifts, using                                                                                                                                                                          |                                                                                                                                                                                                                                               |



|                                |                                                               |                                                                                                                                                                                                         |
|--------------------------------|---------------------------------------------------------------|---------------------------------------------------------------------------------------------------------------------------------------------------------------------------------------------------------|
| (2012)                         |                                                               | lectures, demonstration and return demonstration.                                                                                                                                                       |
| Tom <sup>63</sup><br>(2016)    | patient safety                                                | a two-day patient safety aide training program by the Veteran Affairs Department, with lectures and a competency test.                                                                                  |
| Wagner <sup>65</sup><br>(2018) | delegation and communication                                  | a half-hour learning program with lectures and video, taught by the practitioner investigator.                                                                                                          |
| Ward <sup>66</sup><br>(2014)   | continuing education                                          | the eDOOR (educational offering on the run) program, with flyers, simulation, and mini-in-service study.                                                                                                |
| Wilson <sup>67</sup><br>(2011) | patient handling and mobility                                 | an eight-hour education program (two four-hour parts) with lectures, demonstration, discussion and simulations.                                                                                         |
| Zhao <sup>70</sup><br>(2020)   | knowledge and skills patient and nursing staff's satisfaction | an ADL-stratified, patient-oriented training model, with a 40-hour training for all levels of NAWs and a 32-to-48-hour stratified training for different levels, using lectures and practical training. |
| Zhu <sup>72</sup><br>(2021)    | self-protection                                               | a tertiary training model by companies, nursing department and wards using lectures, practical training, competency test and continuing improving.                                                      |

Theme 3: Appraisal tools (n = 7)

| Study                              | Main focus                                               | Tools                                                                                         | Contents                                                                                                                                                   | Reliability and Validity                                                                                                                                                       |
|------------------------------------|----------------------------------------------------------|-----------------------------------------------------------------------------------------------|------------------------------------------------------------------------------------------------------------------------------------------------------------|--------------------------------------------------------------------------------------------------------------------------------------------------------------------------------|
| Appleby <sup>38</sup><br>(2019)    | intention to following a checklist                       | a 66-item intention questionnaire                                                             | five demographic items, seven on clinical context, seven on habit, 17 on attitude, 15 on subjective norm and 15 on perceived behavior control.             | Overall Cronbach's $\alpha$ 0.83 for HCAs; 24.2% of HCA's intentions were explained                                                                                            |
| Campbell <sup>39</sup><br>(2021)   | relational quality between RN and NA, and patient safety | a seven-item leader-member exchange (LMX-7) questionnaire by Graen and Uhl-Bien <sup>76</sup> | seven items on leader satisfaction, understanding, recognition, problem solving, "bail you out" for employees, and confidence and relationships of leader. | Overall Cronbach's $\alpha$ 0.89 for NAs.                                                                                                                                      |
| Dykes <sup>42</sup><br>(2011)      | preventing falls                                         | an eight-item Self-Efficacy for Preventing Falls – Assistant (SEPPFA) scales                  | eight items on confidence, communication, understanding of the environment and team working for preventing falls                                           | Overall Cronbach's $\alpha$ 0.69 – 0.74; item total correlation 0.3 – 0.7.                                                                                                     |
| Haigh <sup>47</sup><br>(2019)      | feedback of the Care Certificate                         | an 18-item questionnaire                                                                      | eighteen items on confidence, knowledge and skills, and attitudes.                                                                                         | not specified                                                                                                                                                                  |
| Haraldsson <sup>48</sup><br>(2021) | workload                                                 | the Structured Multi-disciplinary Evaluation Tool (SMET)                                      | 22 items on movement, position, pace, eyesight, sitting, noise, space, lighting of workplace, and working condition, attitude, and satisfaction.           | validity test: P-values of correlation between SMET subgroup scores and surface electromyography measure outcome were ranged from 0.001 to 0.05, indicating the effectiveness. |
| Kennerly <sup>49</sup><br>(2012)   | nursing culture                                          | the Nursing Culture Assessment Tool (NCAT)                                                    | 19 items and six subscales on expectations, behaviors, teamwork, communication, satisfaction and commitment                                                | Overall Cronbach's $\alpha$ 0.92, and subscales ranged from 0.60 – 0.93<br>validity test: subscale correlations 0.27 – 0.74, comparative fit index 0.94.                       |
| Monteiro <sup>54</sup><br>(2011)   | working capacity                                         | the Work Ability Index                                                                        | seven items on current work ability, diseases, and work impairment                                                                                         | not specified                                                                                                                                                                  |

† This article is an evidence synthesis.

### Frequency Effect Size Analysis

We conducted frequency effect size analysis on the included studies' main focuses and strategies (**table 3** and **figure S1** in **online supplemental file 7**). Fifteen main focuses were identified at four levels. The most reported focuses were competency at the NA level (frequency effect size 33%), communication and clinical staff satisfaction (both 14%) at the clinical personnel level, and patient satisfaction (25%) at the patient level. Both topics at the fourth facility management level (retention and care quality control) were at a 6% level of effect size.

Twenty studies contained the theme of education and training strategies. Face-to-face lectures were still the most employed method (80%), followed by simulation, role play, and practical training (30%). We also noted that flyers with various knowledge and skills for CNA continuing education were designed by Ward et al.,<sup>66</sup> which was a unique and effective method not adopted by other studies. Due to the significant heterogeneity, we failed to distinguish themes in studies on NA administration methods and only summarized their objectives. Approximately 62% of the studies evaluated tools for administration, and the other five papers were on hospital management models (38%).

**Table 3** Frequency effect size analysis of main focuses and intervention methods

| Topics | Studies | Frequency effect size |
|--------|---------|-----------------------|
|--------|---------|-----------------------|

| Topics                                                 | Studies                                        | Frequency effect size |
|--------------------------------------------------------|------------------------------------------------|-----------------------|
| Main focus (n = 36)                                    |                                                |                       |
| Level 1: NA                                            |                                                |                       |
| competency (skills and knowledge)                      | 44, 45, 47, 50, 52, 54, 55, 57, 60, 67, 68, 70 | 33%                   |
| self-efficacy, job-related identity and responsibility | 43, 47, 49, 52, 73                             | 14%                   |
| satisfaction                                           | 43, 49, 52, 55, 59                             | 14%                   |
| continuing education                                   | 61, 66, 68                                     | 8%                    |
| self-protection                                        | 46, 72                                         | 6%                    |
| workload and stress                                    | 41, 48                                         | 6%                    |
| intention                                              | 38                                             | 3%                    |
| Level 2: clinical personnel                            |                                                |                       |
| communication and teamwork                             | 40, 47, 49, 56                                 | 14%                   |
| clinical/nursing staff satisfaction                    | 51, 55, 59, 68, 70                             | 14%                   |
| relationship                                           | 39                                             | 3%                    |
| Level 3: patient                                       |                                                |                       |
| patient satisfaction                                   | 45, 51, 55, 58, 59, 68, 70, 71, 73             | 25%                   |
| patient safety                                         | 42, 45, 53, 63, 64                             | 11%                   |
| relationships                                          | 58                                             | 3%                    |
| Level 4: facility management                           |                                                |                       |
| retention/turnover                                     | 59, 62                                         | 6%                    |
| care quality control                                   | 52, 69                                         | 6%                    |
| Intervention method                                    |                                                |                       |
| Education & training (n = 20)                          |                                                |                       |
| lecture                                                | 50-52, 55, 56-58, 60, 61, 63, 65, 67-70, 72    | 80%                   |
| simulation/role play                                   | 50, 55, 58, 66-68                              | 30%                   |
| practical training                                     | 52, 55, 56, 68, 70, 72                         | 30%                   |
| exam                                                   | 62, 63, 66, 69, 72                             | 25%                   |
| discussion                                             | 50, 56, 58, 67                                 | 20%                   |
| video                                                  | 50, 57, 65, 68                                 | 20%                   |
| demonstration                                          | 61, 67-69                                      | 20%                   |
| web-based training                                     | 41, 50                                         | 10%                   |
| group study                                            | 50, 55                                         | 10%                   |
| scenario                                               | 53, 57                                         | 10%                   |
| flyer                                                  | 66                                             | 5%                    |

## DISCUSSION

This review outlined existing administration tools, management models, education programs and appraisal scales from previous studies. The results implied a need to investigate more on administration models and frameworks for NA administration in hospitals. High-quality evidence of the efficacy of existing educational strategies was scarce. Gaps in NA administration development and current circumstances between developed and developing areas were noted and needed improvement.

### Approaches and Models

Existing articles for administration approaches, models, and frameworks were scarce. Only fourteen studies presented evaluations on these topics, and the focuses were region-specific, i.e., researchers from China and the Europe-US region typically targeted different objectives.

In China, NAWs were employed by companies or hospitals, or were self-employed.<sup>79-80</sup> The company employment model took the majority.<sup>81</sup> The selection and training of NAWs were conducted by directors and executors of companies but not clinical professionals, leading to uncontrolled quality of care and muddled management.<sup>79-82</sup> The researchers proposed to improve this context. Included Chinese studies showed a three-tiered hierarchical model where NAWs were managed by (1) nurse departments or NAW centers, (2) head nurses and (3) ward nurses. However, this review revealed remarkable heterogeneity and unrepresentative sampling in this area. Further investigation of the hospital management model and the effectiveness of other mature models in Chinese hospitals can be the next step.

Chinese researchers also evaluated the FMEA model, ADL scale and Quality Control Circle (QCC). FMEA and QCC were widely-used mature models in hospital routine management<sup>83-86</sup>, but have rarely been evaluated for NAs. However, without any new points added, the ideas were only a panning from nurses to NAs. On the other hand, the application of ADL scale was more innovative. ADL was first developed by Katz<sup>87</sup> and is one of the most widely used tools for assessing patient functions. Different ADL scores and levels represented patients' statuses and care needs to guide managers to a more cost-effective and patient-oriented model of NA allocation.

For researchers from the countries where NA industry has been highly developed, a holistic program was typically their focus. They also focused on more humanistic aspects such as communication, workload, safety, etc. They<sup>41-58</sup> developed or evaluated programs to improve administration, i.e., the TeamSTEPPS program, BREATHE program and the Care Partner Programs. The programs were well-designed and of good availability, but the small sample size still placed barriers to their widespread application. Additional studies on approaches to widen the applicability and design of more diverse programs are crucial.

The difference in the hotspots of the research area was strongly related to the degree of development of NA industry in different regions. Our included studies were strongly demand-driven. In a region where NA regulations were not yet well-established, relevant studies tended to be more primary and discuss basic administration structures, e.g., employment modes. On the contrary, in countries where NAs were mandated by law to be employed and managed by healthcare institutes themselves, the topic was no

longer necessary for research, and researchers have turned to explore more advanced knowledge.

### **Educational Strategies**

Eleven groups of educational strategies were applied to 20 included studies. 90% of the studies employed at least two groups of strategies, with an average of 2.60, and multiple education methods may result in more positive outcomes compared to single-method teaching.<sup>88</sup> A simulation was highlighted because it has been shown to be effective in nursing education,<sup>89 90</sup> and a debrief simulation method was recommended.<sup>91</sup> Web-based training has become a modern trend, especially during the COVID-19 pandemic.<sup>92</sup> However, the evidence regarding the effectiveness of e-learning in nursing education remains unclear.<sup>93 94</sup> Moreover, half of the articles used interactive methods, e.g., simulation, discussion and group study. We found this to be a trend in NA education and training in recent years. When transferring these teaching methods to NAs, attention should be paid to the educational background gap between NAs and nursing students.

### **Focuses and Topics**

Twenty-three focuses were initially found by the frequency effect analysis, where 15 topics were distilled. NA knowledge and skills were most widely considered, with a trend of being more specified for improving competency. Most of the studies conducted an on-the-job training mode, thus the necessity of exploring advanced competency to avoid repeats. Focuses that contributed smaller effect sizes may denote the possible directions of future studies. NA intentions, relationships of NA-other nursing staff and NA-patients, workload, stress and retention in hospitals needed more investigation. Existing studies revealed that all of the factors above influenced the quality of care at the RN or nursing home level,<sup>95-98</sup> but evidence of influence and improvement methods of NAs in hospitals is limited.

A noteworthy point was that much of the research in this area of NA was essentially a transposition of methods previously applied among RNs to NAs, within all three fields this review investigated. FMEA, QCC, and patient satisfaction were significant examples. However, as discussed above, researchers should be very careful when dealing with the differences in educational background and job content between RNs and NAs.

### **Negative Outcomes**

Three studies<sup>46 62 64</sup> reported notable negative or mixed outcomes. The systematic review from Geoffrion<sup>46</sup> et al. supposed that both patients and healthcare workers may not benefit from educational programs on workplace aggression for clinical staff, revealing that other approaches or the education for patients may be conducted for the improvement of NA safety. Swann<sup>62</sup> evaluated the influence of the CNA orientation coaches on the retention rate and derived a negative result, while Twigg<sup>64</sup> placed an analysis of adding AINs to acute care wards with unexpected outcomes on failure to rescue, urinary tract infection, and falls. The sample of the latter two articles was still limited, with the potential risk of inadequate study designs (observational study to evaluate the interventions), so researchers may conduct more studies on their topics in spite of the discouraging results.

### **Gaps**

Several gaps were concluded for the NA administration area: (1) NA definitions, regulations and circumstances varied widely among countries, especially between high-income and those with moderate to low incomes, which created barriers to global evidence and practical experience shared processes. (2) The limited sample sizes and nonrandomized study designs of the included studies may decrease the reliability of outcomes. (3) The included studies were of low-to-moderate quality of evidence and availability, and the study design was not reported in-detailed. There were barriers between existing studies and evidence-based practice. (4) Theories and conceptual frameworks were often neglected in the study designs.

### **Limitations**

The diversified intervention methods of the included studies led to significant heterogeneity, so barriers existed for further analysis and synthesis. We included only Chinese and English articles, while studies published in other languages were excluded, thus leading to a potential risk of bias. Furthermore, more studies may not be included for analysis in other social sciences databases, as NA administration is a broad, multidisciplinary and interdisciplinary topic. We also noted that three included evidence-based reviews addressed 32 original studies, where 13 studies were published between 2011 and 2022 but were not included in our scoping review, implying a potential risk of incomprehensiveness of our work.

## **CONCLUSION**

This scoping review demonstrated the practical administration approaches and focus from previous studies for hospital nursing assistants. The review found a total of nine administration methods, one administration model, 15 education and training programs, and seven appraisal tools. With the frequency effect size analysis, 15 main focus groups and 11 educational strategies used for improving administration were outlined. The insight from our review will add knowledge to effective NA administration for hospital managers and head nurses and help to improve the quality of care with increasing evidence.

Barriers remain between the intrahospital NA administration area and evidence-based nursing research and practice. The endeavour to apply evidence-based methods to administration will be arduous but will contribute greatly to improved outcomes.

We expect that the administration approaches concluded by our study will help leaders interpret more about effective management to improve quality of care and benefit all clinical staff and patients. The difference between hospitals and long-term care settings should be recognized, and more studies on NAs in hospitals are expected. Researchers should draw more attention to evidence-based methods in the administration area, resulting in continuous improvement, global sharing and system establishment of intrahospital

nursing assistants' administration.

**Acknowledgements:** We acknowledge Ms. Zhuo Lin and Ms. Zhang Yu-jing for their ideas on study design, data synthesis, and manuscript refinement.

**Contributors:** ZB and CS performed study selection, data charting and quality appraisal. ZB and JY completed the study design, search, data synthesis and composition of the manuscript, and study design was also refined by Ms. Zhuo Lin and Ms. Zhang Yu-jing. Any raised disagreement was discussed and solved by ZB, CS, JY and DJ. All authors and Ms. Zhuo Lin, Ms. Zhang Yu-jing contributed to the revisions and refinement of the manuscript.

**Funding:** The authors received no financial support for the research, authorship or publication of this article.

**Competing Interests:** The authors declare that there is no conflict of interest.

**Ethics Approval:** A scoping review does not contain human or animal-related objectives, tissues or data, and all data used in this study were from publicly available source, so it is not necessary for this review to have an ethical approval.

**Data Availability Statement:** Data are available in a public, open access repository. The data that supports the findings of this study are available in the supplementary material of this article, and the protocol of this study are openly available (DOI: 10.13140/RG.2.2.29106.12483/1)

## References

- 1 U.S. Bureau of Labor Statistics. 2018 SOC Definitions. Available: [https://www.bls.gov/soc/2018/soc\\_2018\\_definitions.pdf](https://www.bls.gov/soc/2018/soc_2018_definitions.pdf) [Accessed 2 Dec 2021].
- 2 Eurostat. Healthcare personnel statistics - nursing and caring professionals. Available: [https://ec.europa.eu/eurostat/statistics-explained/index.php?title=Healthcare\\_personnel\\_statistics\\_-\\_nursing\\_and\\_caring\\_professionals](https://ec.europa.eu/eurostat/statistics-explained/index.php?title=Healthcare_personnel_statistics_-_nursing_and_caring_professionals) [Accessed 6 Nov 2021].
- 3 Jumabhoy S, Jung HY, Yu J. Characterizing the direct care health workforce in the United States, 2010-2019. *Journal of American Geriatric Society* 2022;70(2):512-21.
- 4 NSI Nursing Solutions. 2021 NSI National Health Care Retention & RN Staffing Report. Available: [https://www.nsinursingsolutions.com/Documents/Library/NSI\\_National\\_Health\\_Care\\_Retention\\_Report.pdf](https://www.nsinursingsolutions.com/Documents/Library/NSI_National_Health_Care_Retention_Report.pdf) [Accessed 19 Nov 2021]
- 5 Zhang X, Tai D, Pforsich H, et al. United States registered nurse workforce report card and shortage forecast: a revisit. *Am J Med Qual* 2017;33(3):229-36.
- 6 Blay N, Roche MA. A systematic review of activities undertaken by the unregulated nursing assistant. *J Adv Nurs* 2020;76(7):1538-51.
- 7 Campbell AR, Kennerly S, Swanson M, et al. Relational quality between the RN and nursing assistant: essential for teamwork and communication. *J Nurs Adm* 2021;51(9):461-7.
- 8 Office for National Statistics. SOC 2020 Volume 2: the coding index and coding rules and conventions. Available: <https://www.ons.gov.uk/methodology/classificationsandstandards/standardoccupationalclassification/soc2020/soc2020volume2codingrulesandconventions> [Accessed 20 Nov 2021].
- 9 Omnibus Budget Reconciliation Act of 1987: Conference report filed in House, H. Rept. 100-495, 100<sup>th</sup> Congress December (1987).
- 10 Cavendish C. The Cavendish Review. Available: [https://assets.publishing.service.gov.uk/government/uploads/system/uploads/attachment\\_data/file/236212/Cavendish\\_Review.pdf](https://assets.publishing.service.gov.uk/government/uploads/system/uploads/attachment_data/file/236212/Cavendish_Review.pdf) [Accessed 13 Nov 2021].
- 11 Eurodiaconia. The education, training and qualifications of nursing and care assistants across Europe. Available: <https://www.eurodiaconia.org/wordpress/wp-content/uploads/2016/08/The-education-training-and-qualifications-of-nursing-and-care-assistants-across-Europe-Final.pdf> [Accessed 16 Nov 2021].
- 12 Skills for Care, Skills for Health, Health Education England. The Care Certificate Workbook. Available: <https://www.skillsforcare.org.uk/Learning-development/inducting-staff/care-certificate/Care-Certificate-workbook.aspx> [Accessed 16 Nov 2021].
- 13 Guojia weishengjiankang weiyuanhui [National Health Commission of the People's Republic of China]. [Strengthening the training and standardized management of nursing assistants]. Available: <http://www.nhc.gov.cn/cms-search/xxgk/getManuscriptXxgk.htm?id=f239ab4290f94d3cb6b36d1705e29f34> [Accessed 13 Nov 2021].
- 14 Burgio LD, Stevens A, Burgio KL, et al. Teaching and maintaining behavior management skills in the nursing home. *Gerontologist* 2002;42(4):487-96.
- 15 Centers for Disease Control and Prevention. National Nursing Assistant Survey. Available: <https://www.cdc.gov/nchs/nnhs/nnas.htm> [Accessed 19 Nov 2021].
- 16 Cready CM, Yeatts DE, Gosdin MM, et al. CNA empowerment: Effects on job performance and work attitudes. *J Gerontol Nurs* 2008;34(3):26-35.
- 17 Gion T, Abitz T. An approach to recruitment and retention of certified nursing assistants using innovation and collaboration. *J Nurs Adm* 2019;49(7/8):354-8.
- 18 Probst JC, Baek JD, Laditka SB. Characteristics and recruitment paths of certified nursing assistants in rural and urban nursing homes. *J Rural Health* 2009;25(3):267-75.
- 19 Temple A, Dobbs D, Andel R. Exploring correlates of turnover among nursing assistants in the National Nursing Home Survey. *Health Care Manage Rev* 2009;34(2):182-90.
- 20 Choi J, Johantgen M. The importance of supervision in retention of CNAs. *Res Nurs Health* 2012;35(2):187-99.
- 21 Loomer L, Grabowski DC, Yu H, et al. Association between nursing home staff turnover and infection control citation. *Health Services Research* 2021;57(2):322-32.
- 22 Molero-Jurado MDM, Pérez-Fuentes MDC, Gázquez-Linares, JJG, et al. Burnout risk and protection factors in certified nursing aides. *Int J Environ Res Public Health* 2018;15(6):1116.
- 23 Hagerty D, Buelow JR. Certified nursing assistants' perceptions and generational differences. *Am J Health Sci* 2017;8(1):1-6.
- 24 Saiki M, Takemura Y, Kunie K. Nursing assistants' desired roles, perceptions of nurses' expectations and effect on team participation: a cross-sectional study. *J Nurs Manag* 2021;29(5):1046-53.
- 25 Cao J, Zhang L, Zhu J, et al. [The current situation of nursing staff grading at home and abroad, and assumption of nursing staff grading in China]. *[Nursing Journal of Chinese People's Liberation Army]* 2006;(6):44-6.
- 26 Wang L, Guo H, Lei Y, et al. [Personnel staffing in long term-care facilities: a review]. *[Chinese Journal of Nursing]* 2014;49(8):981-5.
- 27 The Joanna Briggs Institute. The Joanna Briggs Institute reviewers' manual 2015: methodology for JBI scoping reviews. Available: <https://nursing.lsuhs.edu/JBI/docs/ReviewersManuals/Scoping-.pdf> [Accessed 3 Nov 2021].
- 28 Peters M, Godfrey C, Khalil H, et al. Guidance for conducting systematic scoping reviews. *Int J Evid Based Healthc* 2015;13(3):141-6.
- 29 Tricco AC, Lillie E, Zarin W, et al. PRISMA Extension for Scoping Reviews (PRISMA-ScR): Checklist and Explanation. *Ann Intern Med* 2018;169(7):467-73.
- 30 Zeng B, Du J. Administration models of education, training and appraisal of nursing assistants in inpatient care: a protocol for a scoping review. Available: <https://doi.org/10.13140/RG.2.2.29106.12483/1> [Accessed 2 Nov 2021].
- 31 Moher D, Shamseer L, Clarke M, et al. Preferred reporting items for systematic review and meta-analysis protocols (PRISMA-P) 2015 statement. *Syst Rev* 2015;4(1):1.
- 32 Shamseer L, Moher D, Clarke M, et al. Preferred reporting items for systematic review and meta-analysis protocols (PRISMA-P) 2015: elaboration and explanation. *Br Med J* 2015;349:g7647.
- 33 Koster J. PubMed PubReMiner. Available: <https://hgserver2.amc.nl/cgi-bin/miner/miner2.cgi> [Accessed 31 Oct 2021].
- 34 Hong Q, Pluye P, Fabregues S, et al. Mixed Methods Appraisal Tool (MMAT) version 2018. Available: <http://mixedmethodsappraisaltoolpublic.pbworks.com/> [Accessed 7 Nov 2021].
- 35 Pluye P, Hong QN. Combining the power of stories and the power of numbers: mixed methods research and mixed studies reviews. *Annu Rev Public Health* 2014;35(1):29-45.
- 36 Shea BJ, Reeves BC, Wells G, et al. AMSTAR 2: a critical appraisal tool for systematic reviews that include randomised or non-randomised studies of healthcare interventions, or both. *Br Med J* 2017;358:j4008.
- 37 Sandelowski M, Barroso J, Voils CI. Using qualitative metasummary to synthesize qualitative and quantitative descriptive findings. *Res Nurs Health* 2007;30(1):99-111.
- 38 Appleby BE. Implementing guideline-checklists: Evaluating health care providers intentional behaviour using an extended model of the theory of planned behaviour. *J Eval Clin Pract* 2019;25(4):664-75.
- 39 Campbell AR, Kennerly S, Swanson M, et al. Manager's influence on the registered nurse and nursing assistant relational quality and patient safety culture. *J Nurs Manag* 2021;29(8):2423-32.
- 40 Campbell AR, Layne D, Scott E, et al. Interventions to promote teamwork, delegation and communication among registered nurses and nursing

- assistants: an integrative review. *J Nurs Manag* 2020;28(7):1465-72.
- 41 Dutton S, Kozachik SL. Evaluating the outcomes of a web-based stress management program for nurses and nursing assistants. *Worldviews Evid Based Nurs* 2020;17(1):32-8.
- 42 Dykes PC, Carroll D, McColgan K, et al. Scales for assessing self-efficacy of nurses and assistants for preventing falls. *J Adv Nurs* 2011;67(2):438-49.
- 43 Feng R, Li J, Shi N, et al. [The comparison research of the working conditions of nursing assistants under directly and indirectly employed management models]. *[Medicine and Society]* 2013;26(10):39-41.
- 44 Friesen L, Andersen E. Outcomes of collaborative and interdisciplinary palliative education for health care assistants: a qualitative metasummary. *J Nurs Manag* 2019;27(3):461-81.
- 45 Gao J, Zhao H. [Dual management based on evidence-based nursing care in organizing nursing attending workers]. *[Nursing of Integrated Traditional Chinese and Western Medicine]* 2017;3(11):169-72.
- 46 Geoffrion S, Hills DJ, Ross HM, et al. Education and training for preventing and minimizing workplace aggression directed toward healthcare workers. *Cochrane Database Syst Rev* 2020;9(9):CD011860.
- 47 Haigh SM, Garside J. Effects of the Care Certificate on healthcare assistants' ability to identify and manage deteriorating patients. *Nurs Manage* 2019;26(3):e1798.
- 48 Haraldsson P, Areskoug-Josefsson K, Rolander B, et al. Comparing the Structured Multidisciplinary work Evaluation Tool (SMET) questionnaire with technical measurements of physical workload in certified nursing assistants in a medical ward setting. *Appl Ergon* 2021;96:103493.
- 49 Kennerly SM, Yap TL, Hemmings A, et al. Development and psychometric testing of the nursing culture assessment tool. *Clin Nurs Res* 2012;21(4):467-85.
- 50 Lee C, Knight SW, Smith SL, et al. Safe patient handling and mobility: development and implementation of a large-scale education program. *Crit Care Nurs Q* 2018;41(3):253-63.
- 51 Liu J, Lin F, Feng Y, et al. [Management and practice of attending workers in hospital]. *[Nursing of Integrated Traditional Chinese and Western Medicine]* 2017;3(4):156-8.
- 52 Ma Y, Yin Y, Zhang Y. [FMEA method in the management of nursing workers in hospital]. *[China Rural Health]* 2019;11(15):20-1.
- 53 McKenzie SM, Turkhud K. Simulation-based education in support of HCA development. *British Journal of Healthcare Assistants* 2013;7(8):392-7.
- 54 Monteiro MS, Alexandre NMC, Milani D, et al. Work capacity evaluation among nursing aides. *Revista da Escola de Enfermagem* 2011;45(5):1177-82.
- 55 Nie Y, Dou L, Wang Y. [Application of group collaborative training model in field training for nursing assistants]. *[Chinese Nursing Management]* 2017;17(6):808-10.
- 56 Nørgaard B, Ammentorp J, Kyvik KO, et al. Communication skills training increases self-efficacy of health care professionals. *J Contin Educ Health Prof* 2012;32(2):90-7.
- 57 Pfeifer P, Vandenhouten C, Purvis S, et al. The impact of education on certified nursing assistants' identification of strategies to manage behaviors associated with dementia. *J Nurses Prof Dev* 2018;34(1):26-30.
- 58 Prestia A, Dyess S. Maximizing caring relationships between nursing assistants and patients: Care Partners. *J Nurs Adm* 2012;42(3):144-7.
- 59 Qiu Y, Wang J, Wu H, et al. [Practice and effects of construction of nursing assistant classification service standards based on Activities of Daily Living Scale]. *[Chinese Journal of Modern Nursing]* 2020;26(21):2858-62.
- 60 Ritchie R, Wood S, Martin FC, et al. Impact of an educational training program on restorative care practice of nursing assistants working with hospitalized older patients. *J Clin Outcomes Manag* 2017;24(9):425-32.
- 61 Small A, Atleno OL, Joseph T. Continuing education for patient care technicians: a unit-based, RN-led initiative. *Am J Nurs* 2012;112(8):51-5.
- 62 Swann RA. The Effect of Training and Recognition on Nursing Assistant Retention in Acute Care Settings [master's dissertation]. Cleveland: Gardner-Webb University; 2018. 46 p.
- 63 Tom C. Improving Patient Safety through Patient Safety Aide (Sitter) Competency Education [doctor's dissertation]. Cleveland: Gardner-Webb University; 2016. 80 p.
- 64 Twigg DE, Myers H, Duffield C, et al. The impact of adding assistants in nursing to acute care hospital ward nurse staffing on adverse patient outcomes: an analysis of administrative health data. *Int J Nurs Stud* 2016;63:189-200.
- 65 Wagner EA. Improving patient care outcomes through better delegation-communication between nurses and assistive personnel. *J Nurs Care Qual* 2018;33(2):187-93.
- 66 Ward S, Stewart D, Ford D, et al. Educating certified nursing assistants educational offerings on the run and more. *J Nurses Prof Dev* 2014;30(6):296-302.
- 67 Wilson CM, Baumont MM, Alberstadt KM, et al. The effectiveness of a patient handling education program for nursing assistants as taught by physical therapy and nursing educators. *J Acute Care Phys Ther* 2011;2(1):12-38.
- 68 Wu L, Pu M, Chen Y. [Application of hospital management model to the management of nurse attendants]. *[Journal of Qilu Nursing]* 2015;21(12):21-3.
- 69 Yu Q. [Application of Quality Control Circle to hand hygiene of nursing assistants in psychiatric geriatric wards]. *[Journal of Traditional Chinese Medicine Management]* 2015;23(8):58-60.
- 70 Zhao W, Wang Y, Han J, et al. [Effects of stratified training of nursing assistants based on patient demands]. *[Chinese Journal of Modern Nursing]* 2020;26(32):4533-6.
- 71 Zhi M, He Z, Ji J, et al. Patient satisfaction with non-clinical nursing care provided by the nursing assistant under different management models in Chinese public tertiary hospital. *Appl Nurs Res* 2021;151431.
- 72 Zhu D, Jiang Y, Chen Y, et al. [Practice of nursing assistant self-protection training program during the epidemic period of COVID-19]. *[Shanghai Nursing]* 2021;21(9):61-3.
- 73 Zhu F, Qu X, Hu C. [Effectiveness of the inform sheet in the management of nursing assistants]. *[China Health Industry]* 2019;16(32):125-6.
- 74 Rockwell SK, Kohn H. Post-then-pre evaluation: Measuring behavior change more accurately. *J Ext* 1989;27:19-21.
- 75 Agency for Healthcare Research and Quality. TeamSTEPPS 2.0. Available: <https://www.ahrq.gov/teamstepps/instructor/index.html> [Accessed 26 Nov 2021].
- 76 Graen GB, Uhl-Bien M. Relationship-based approach to leadership: development of leader-member exchange (LMX) theory of leadership over 25 years: applying a multi-level multi-domain perspective. *Leadersh Q* 1995;6(2):219-47.
- 77 Haraldsson P, Jonker D, Strengbom E, et al. Structured Multidisciplinary work Evaluation Tool: development and validation of a multidisciplinary work questionnaire. *Work* 2016;55:883-91.
- 78 Ilmarinen J. The work ability index (WAI). *Occup Med* 2007;57(2):160.
- 79 Chen L, Cheng Y, Meng M, et al. [Analysis of the nursing assistant management models in China]. *[Modern Nurse]* 2020;27(19):21-2.
- 80 Li G, Ying Y. [Current situations of attendant management]. *[Modern Hospitals]* 2021;21(5):739-41.
- 81 Song J. Study on the situation, problem and strategies about nursing assistants in health institutions of Z province [master's dissertation]. Hangzhou: Zhejiang University; 2016. 60 p.
- 82 Wang Y, Jia T, Yuan H. [International comparison of the nursing assistants industry]. *[Chinese Hospitals]* 2016;20(11):76-8.
- 83 Asgari-Dastjerdi H, Khorasani E, Yarmohammadian, MH, et al. Evaluating the application of failure mode and effects analysis technique in hospital wards: a systematic review. *J Inj Violence Res* 2017, 9(1), 51-60.
- 84 Liu HC, Zhang LJ, Ping YJ, et al. Failure mode and effects analysis for proactive healthcare risk evaluation: a systematic literature review. *J Eval Clin*

- Pract* 2020;26(4):1320-37.
- 85 Gilly BA, Touran A, Asai T. Quality control circles in construction. *J Constr Eng Manag* 1987;113(3):427-39.
- 86 Rohrbasser A, Harris J, Mickan S, et al. Quality circles for quality improvement in primary health care: Their origins, spread, effectiveness and lacunae-A scoping review. *PLoS One* 2018;13(12):e0202616.
- 87 The Staff of the Benjamin Rose Hospital. Multidisciplinary studies of illness in aged persons: II. A new classification of functional status in activities of daily living. *J Chronic Dis* 1959;9(1):55-62.
- 88 Huckabay, L. M. (1991). The role of conceptual frameworks in nursing practice, administration, education, and research. *Nur Adm Q* 1991;15(3):17-28.
- 89 Cook DA, Hatala R, Brydges R, et al. Technology-enhanced simulation for health professions education: a systematic review and meta-analysis. *JAMA* 2011;306(9):978-88.
- 90 Mulyadi M, Tonapa SI, Rompas, SSJ, et al. Effects of simulation technology-based learning on nursing students' learning outcomes: a systematic review and meta-analysis of experimental studies. *Nurse Educ Today* 2021;107:105127.
- 91 Lee J, Lee H, Kim S, et al. Debriefing methods and learning outcomes in simulation nursing education: a systematic review and meta-analysis. *Nurse Educ Today* 2020;87:104345.
- 92 Al-Balas M, Al-Balas HI, Jaber HM, et al. Distance learning in clinical medical education amid COVID-19 pandemic in Jordan: current situation, challenges, and perspectives. *BMC Med Educ* 2020;20(1):341.
- 93 Rouleau G, Gagnon MP, Côté J, et al. Effects of e-learning in a continuing education context on nursing care: systematic review of systematic qualitative, quantitative, and mixed-studies reviews. *J Med Int Res* 2019;21(10):e15118.
- 94 Voutilainen A, Saaranen T, Sormunen M. Conventional vs. e-learning in nursing education: a systematic review and meta-analysis. *Nurse Educ Today* 2017;50:97-103.
- 95 Bowers B, Becker M. Nurse's aides in nursing homes: the relationship between organization and quality. *Gerontologist* 1992;32(3):360-6.
- 96 D'Arcy LP, Sasai Y, Stearns SC. Do assistive devices, training, and workload affect injury incidence? Prevention efforts by nursing homes and back injuries among nursing assistants. *J Adv Nurs* 2012;68(4):836-45.
- 97 Epstein NE. Multidisciplinary in-hospital teams improve patient outcomes: a review. *Surg Neurol Int* 2014;5(8):S295-303.
- 98 Squires M, Tourangeau A, Spence LHK, et al. The link between leadership and safety outcomes in hospitals. *J Nurs Manag* 2010;18(8):914-25.

**Figure 1** PRISMA flow diagram for study selection

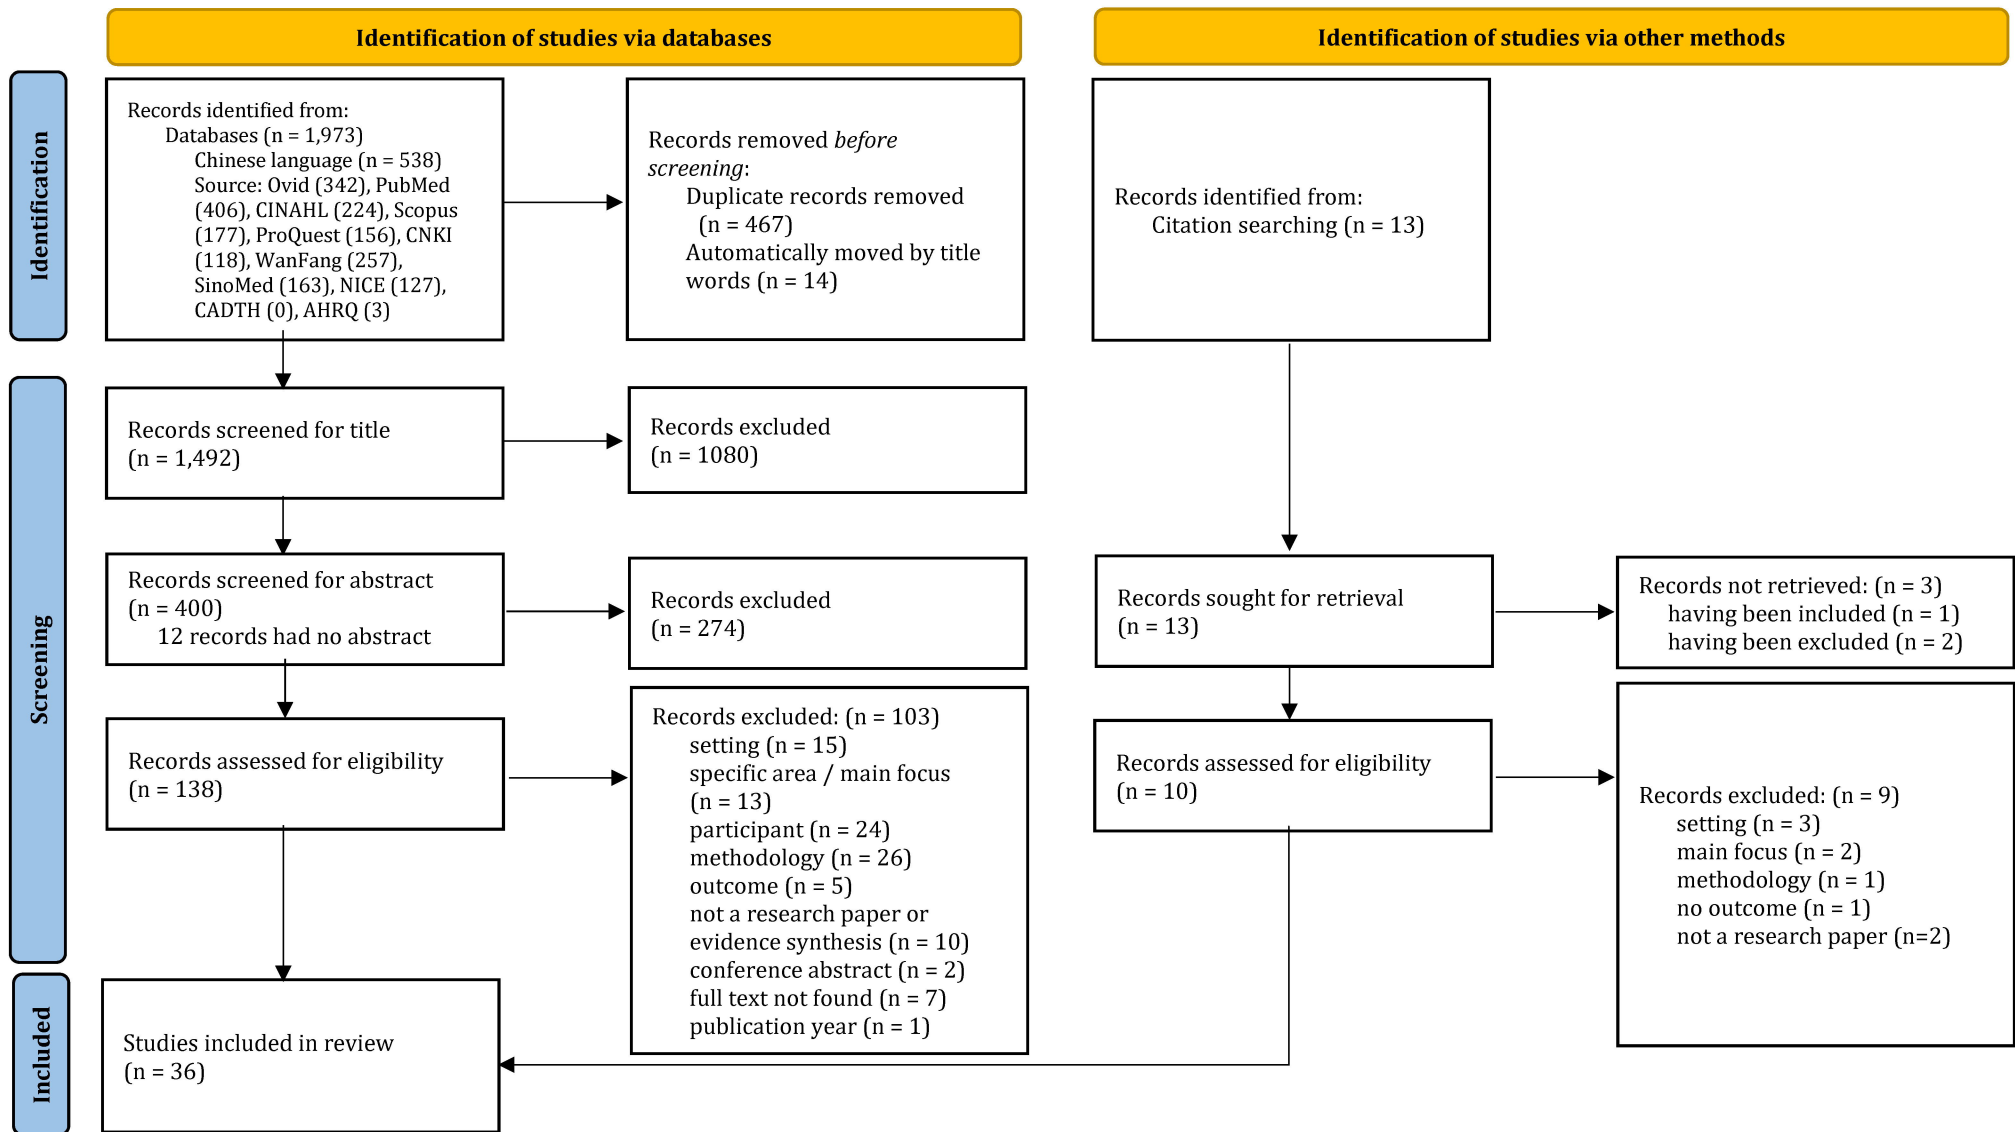

Source: https://www.medrxiv.org/content/10.1101/2022.03.20.22272663v2.full.pdf
